# Supplementary material
Source: PubMed Central journal article supplement (PMC4210837)
Supplement: NIHMS60672-supplement-Supplemental_Material.pdf [file NIHMS60672-supplement-Supplemental_Material.pdf]

# Supplemental Material

## Methods

The European Prospective Investigation into Cancer in Norfolk (EPIC-Norfolk) is a prospective population study of 25,663 male and female inhabitants of Norfolk, United Kingdom, aged between 45 and 79 years who completed a baseline questionnaire survey and attended a clinic visit. EPIC-Norfolk is part of the 10-country collaborative EPIC study designed to investigate dietary and other determinants of cancer. Additional data were obtained to enable assessment of determinants of other diseases.

The study cohort was similar to UK population samples with regard to many characteristics, including anthropometry, blood pressure, and lipids, but with a lower proportion of smokers<sup>1</sup>. Participants were recruited by mail from age-sex registers of general practices. At the baseline survey between 1993 and 1997, participants completed a detailed health and lifestyle questionnaire, and additional data collection was performed by trained nurses at a clinic visit. All individuals have been flagged for mortality at the UK Office of National Statistics, with vital status ascertained for the entire cohort. Death certificates for all decedents were coded by trained nosologists according to the International Classification of Diseases (ICD) 9<sup>th</sup> revision. Death was considered due to CAD if the underlying cause was coded as ICD 410 to 414. In addition, participants admitted to a hospital were identified by their unique National Health Service number by data linkage with ENCORE (East Norfolk Health Authority database), which identifies all hospital contacts throughout England and Wales for Norfolk residents. Participants were identified as having CAD during follow-up if they had a hospital admission and/or died with CAD listed as an underlying cause. We report results with follow-up up to January 2003, an

average of 6 years. The Norwich District Health Authority Ethics Committee approved the study, and all participants gave written informed consent.

### **Reference**

1. Day N, Oakes S, Luben R, Khaw KT, Bingham S, Welch A, Wareham N. EPIC-Norfolk: study design and characteristics of the cohort. European Prospective Investigation of Cancer. *Br J Cancer*. 1999;80 Suppl 1:95-103.

**Supplemental Table I. Odds Ratios for Future CAD Events by MCP-1 Quartile and for MCP-1 as Continuous Variable for men and women only**

|                              | MCP-1 quartiles |                     |                     |                     | P*    | Ln(MCP-1)†          | P‡    |
|------------------------------|-----------------|---------------------|---------------------|---------------------|-------|---------------------|-------|
|                              | 1               | 2                   | 3                   | 4                   |       |                     |       |
| <b>Men</b>                   |                 |                     |                     |                     |       |                     |       |
| MCP-1 levels (pg/ml)         | < 38.4          | 38.4 to 51.4        | 51.4 to 67.1        | > 67.1              | -     | -                   | -     |
| Total no. of patients        | 436             | 434                 | 421                 | 453                 | -     | -                   | -     |
| Cardiovascular events, n (%) | 157 (36.0)      | 154 (35.5)          | 143 (34.0)          | 174 (38.4)          | -     | -                   | -     |
| Model 1                      | 1               | 0.97 (0.73 to 1.29) | 0.90 (0.68 to 1.21) | 1.09 (0.82 to 1.46) | 0.606 | 1.08 (0.85 to 1.37) | 0.535 |
| Model 2                      | 1               | 0.93 (0.68 to 1.27) | 0.80 (0.59 to 1.10) | 0.88 (0.65 to 1.20) | 0.565 | 0.90 (0.70 to 1.16) | 0.418 |
| Model 3                      | 1               | 0.91 (0.68 to 1.23) | 0.81 (0.60 to 1.01) | 0.94 (0.69 to 1.27) | 0.578 | 0.96 (0.75 to 1.22) | 0.714 |
| <b>Women</b>                 |                 |                     |                     |                     |       |                     |       |
| MCP-1 levels (pg/ml)         | < 38.0          | 38.0 to 50.8        | 50.8 to 66.1        | > 66.1              | -     | -                   | -     |
| Total no. of patients        | 253             | 260                 | 244                 | 262                 | -     | -                   | -     |
| Cardiovascular events, n (%) | 88 (34.8)       | 94 (36.2)           | 78 (32.0)           | 97 (37.0)           | -     | -                   | -     |
| Model 1                      | 1               | 1.08 (0.74 to 1.59) | 0.88 (0.60 to 1.31) | 1.12 (0.77 to 1.65) | 0.605 | 1.00 (0.73 to 1.37) | 0.994 |
| Model 2                      | 1               | 1.04 (0.69 to 1.58) | 0.92 (0.60 to 1.41) | 1.21 (0.79 to 1.85) | 0.608 | 1.00 (0.71 to 1.41) | 0.994 |
| Model 3                      | 1               | 0.97 (0.65 to 1.44) | 0.80 (0.53 to 1.21) | 1.07 (0.71 to 1.60) | 0.526 | 0.98 (0.70 to 1.36) | 0.905 |

Odds ratios and corresponding 95% confidence intervals calculated by conditional logistic regression, taking into account matching for age, and enrollment time, per MCP-1 quartile. CRP, triglycerides and MCP-1 were log-transformed before analysis. Model 1: unadjusted. Model 2: Adjusted for BMI, smoking status, systolic blood pressure, LDL-cholesterol, HDL-cholesterol and CRP. Model 3: adjustment for the FRS. P\* = p value for the association between MCP-1 quartiles and CAD risk. P† = Odds ratios and corresponding 95% confidence intervals calculated by conditional logistic regression, taking into account matching for age and enrollment time, for MCP-1 as continuous variable. P‡ = p value corresponding to Ln(MCP-1). MCP-1 = Monocyte chemoattractant protein-1; LDL = low-density lipoprotein; HDL = high-density lipoprotein; FRS = Framingham Risk Score.

**Supplemental Table II. *CCL2* Polymorphism Characteristics**

| <b>Gene position</b> | <b>RS Number</b> | <b>Nucleotide change</b> | <b>Variant type Location</b> | <b>MAF cohort</b> | <b>MAF control</b> | <b>Genotyping success, %</b> |
|----------------------|------------------|--------------------------|------------------------------|-------------------|--------------------|------------------------------|
| -2835                | 2857654          | C > A                    | DRR                          | 0.28              | 0.27               | 93.6                         |
| -2578                | 1024611          | A > G                    | DRR                          | 0.28              | 0.27               | 94.3                         |
| -2136                | 1024610          | A > T                    | DRR                          | 0.20              | 0.20               | 93.5                         |
| -1811                | 3760399          | A > G                    | DRR                          | 0.04              | 0.05               | 94.5                         |
| -927                 | 3760396          | G > C                    | Promoter                     | 0.21              | 0.21               | 94.6                         |
| +764                 | 2857657          | C > G                    | Intron 1                     | 0.20              | 0.19               | 94.4                         |
| +3726                | 2530797          | T > C                    | 3'Flanking                   | 0.38              | 0.38               | 93.7                         |

*CCL2* polymorphisms characteristics. MAF = minor allele frequency; MAF cohort = minor allele frequencies calculated in the cases and controls and of the controls only (MAF control); HWE = Hardy Weinberg equilibrium;  $X^2$  = Chi-squared distribution with 1 degree of freedom to test for deviations from Hardy–Weinberg equilibrium with corresponding p-value (HWE P); DRR = distal regulatory region.

**Supplemental Table III. Distribution of cardiovascular risk factor among the *CCL2* polymorphisms**

| Gene position                      | -2835          |                |                | -2578          |                |                | -2136          |                |                | -1811          |                |
|------------------------------------|----------------|----------------|----------------|----------------|----------------|----------------|----------------|----------------|----------------|----------------|----------------|
|                                    | CC             | CA             | AA             | AA             | AG             | GG             | AA             | AT             | TT             | AG             | GG             |
| No. of participants                | 1349           | 1045           | 191            | 1360           | 1052           | 194            | 1679           | 785            | 120            | 232            | 2378           |
| Age, years                         | 65             | 65             | 66             | 65             | 65             | 66             | 65             | 65             | 65             | 65             | 65             |
|                                    | (65to66)       | (65to66)       | (65 to 67)     | (65 to 66)     | (65 to 66)     | (65 to 67)     | (65 to 66)     | (65 to 66)     | (63 to 66)     | (64 to 66)     | (65 to 66)     |
| Women, %                           | 493 (37)       | 372 (36)       | 76 (40)        | 497 (37)       | 371 (35)       | 78 (40)        | 594 (35)       | 292 (37)       | 46 (38)        | 72 (31)        | 876 (37)       |
| Body mass index, kg/m <sup>2</sup> | 26.7           | 26.6           | 25.9           | 26.7           | 26.6           | 25.8           | 26.6           | 26.6           | 26.6           | 26.6           | 26.6           |
|                                    | (26.5 to 26.9) | (26.4 to 26.8) | (25.4 to 26.3) | (26.5 to 26.9) | (26.4 to 26.8) | (25.3 to 26.3) | (26.4 to 26.7) | (26.3 to 26.8) | (26.1 to 27.2) | (26.2 to 27.0) | (26.4 to 26.7) |
| Waist circumference, cm            | 92.2           | 92.4           | 90.4           | 92.2           | 92.5           | 90.1           | 92.3           | 92.1           | 91.5           | 93.4           | 92.0           |
|                                    | (91.6 to 92.8) | (91.7 to 93.1) | (88.8 to 92.0) | (91.6 to 92.8) | (91.8 to 93.2) | (88.5 to 91.7) | (91.7 to 92.8) | (91.3 to 93.0) | (89.4 to 93.6) | (92.1 to 94.7) | (91.5 to 92.5) |
| Current Smoker, %                  | 134 (9.9)      | 130 (12.4)     | 20 (10.5)      | 135 (9.9)      | 131 (12.5)     | 19 (9.8)       | 192 (11.4)     | 77 (9.8)       | 13 (10.8)      | 32 (13.8)      | 256 (10.8)     |
| Diabetes mellitus, %               | 45 (3.3)       | 32 (3.1)       | 6 (3.1)        | 46 (3.4)       | 31 (2.9)       | 194 (3.1)      | 51 (3.0)       | 26 (3.3)       | 5 (4.2)        | 13 (5.6)       | 71 (3.0)       |
| Systolic blood pressure, mmHg      | 141            | 141            | 139            | 141            | 141            | 139            | 141            | 140            | 141            | 143            | 140            |
|                                    | (140 to 142)   | (140 to 142)   | (136 to 141)   | (140 to 142)   | (140 to 142)   | (136 to 142)   | (141 to 142)   | (139 to 141)   | (137 to 144)   | (141 to 146)   | (140 to 141)   |
| Diastolic blood pressure, mmHg     | 84             | 84             | 82             | 84             | 84             | 82             | 84             | 84             | 85             | 86             | 84             |
|                                    | (84 to 85)     | (84 to 85)     | (81 to 84)     | (84 to 85)     | (84 to 85)     | (81 to 84)     | (84 to 85)     | (83 to 85)     | (83 to 87)     | (85 to 88)     | (84 to 85)     |
| Total cholesterol, mmol/l          | 6.30           | 6.33           | 6.36           | 6.30           | 6.34           | 6.35           | 6.30           | 6.36           | 6.28           | 6.31           | 6.31           |
|                                    | (6.24 to 6.37) | (6.26 to 6.40) | (6.19 to 6.54) | (6.24 to 6.36) | (6.27 to 6.41) | (6.18 to 6.52) | (6.24 to 6.35) | (6.28 to 6.44) | (6.07 to 6.48) | (6.18 to 6.45) | (6.27 to 6.36) |
| LDL-cholesterol, mmol/l            | 4.14           | 4.14           | 4.22           | 4.14           | 4.15           | 4.20           | 4.14           | 4.17           | 4.12           | 4.20           | 4.14           |
|                                    | (4.09 to 4.20) | (4.08 to 4.21) | (4.06 to 4.37) | (4.09 to 4.19) | (4.09 to 4.21) | (4.05 to 4.36) | (4.09 to 4.19) | (4.10 to 4.24) | (3.93 to 4.31) | (4.07 to 4.33) | (4.10 to 4.18) |
| HDL-cholesterol, mmol/l            | 1.32           | 1.33           | 1.35           | 1.32           | 1.33           | 1.36           | 1.33           | 1.34           | 1.33           | 1.26           | 1.34           |
|                                    | (1.30 to 1.34) | (1.31 to 1.36) | (1.30 to 1.41) | (1.30 to 1.34) | (1.31 to 1.36) | (1.31 to 1.41) | (1.31 to 1.34) | (1.31 to 1.36) | (1.25 to 1.40) | (1.22 to 1.31) | (1.32 to 1.35) |
| Triglycerides, mmol/l              | 1.70           | 1.70           | 1.60           | 1.70           | 1.70           | 1.60           | 1.70           | 1.70           | 1.60           | 1.80           | 1.70           |
|                                    | (1.20 to 2.30) | (1.20 to 2.40) | (1.20 to 2.10) | (1.20 to 2.30) | (1.20 to 2.40) | (1.20 to 2.10) | (1.20 to 2.30) | (1.20 to 2.40) | (1.20 to 2.30) | (1.23 to 2.40) | (1.20 to 2.30) |
| C-reactive protein, mg/l           | 1.60           | 1.70           | 1.60           | 1.60           | 1.70           | 1.60           | 1.70           | 1.70           | 1.60           | 1.60           | 1.70           |
|                                    | (0.80 to 3.83) | (0.80 to 3.70) | (0.70 to 3.45) | (0.80 to 3.80) | (0.80 to 3.80) | (0.70 to 3.58) | (0.80 to 3.60) | (0.80 to 4.10) | (0.80 to 3.43) | (0.80 to 3.40) | (0.80 to 3.80) |

Data are presented as mean with the 95% confidence interval or number with the corresponding percentage. Skewed variables are presented as median with the 25<sup>th</sup> to 75<sup>th</sup> percentile. LDL = low-density lipoprotein, HDL = high-density lipoprotein.

**Supplemental Table III continued. Distribution of cardiovascular risk factor among the CCL2 polymorphisms**

| Gene position                      | -927           |                |                | +764           |                |                | -3726          |                |                |
|------------------------------------|----------------|----------------|----------------|----------------|----------------|----------------|----------------|----------------|----------------|
|                                    | GG             | GC             | CC             | CC             | CG             | GG             | TT             | TC             | CC             |
| No. of participants                | 1648           | 842            | 123            | 1689           | 805            | 106            | 984            | 1214           | 391            |
| Age, years                         | 65             | 65             | 65             | 65             | 65             | 65             | 65             | 65             | 65             |
|                                    | (65 to 66)     | (65 to 66)     | (64 to 67)     | (65 to 66)     | (64 to 65)     | (63 to 67)     | (65 to 66)     | (65 to 66)     | (64 to 66)     |
| Women, %                           | 625 (38)       | 285 (34)       | 36 (29)        | 600 (35)       | 301 (37)       | 39 (37)        | 340 (35)       | 443 (37)       | 157 (40)       |
| Body mass index, kg/m <sup>2</sup> | 26.6           | 26.5           | 26.4           | 26.6           | 26.6           | 26.6           | 26.4           | 26.6           | 26.8           |
|                                    | (26.4 to 26.8) | (26.3 to 26.8) | (25.8 to 27.0) | (26.4 to 26.7) | (26.3 to 26.8) | (26.1 to 27.2) | (26.2 to 26.6) | (26.4 to 26.9) | (26.4 to 27.2) |
| Waist circumference, cm            | 92.2           | 92.3           | 92.4           | 92.3           | 92.1           | 91.8           | 92.0           | 92.4           | 91.8           |
|                                    | (91.6 to 92.7) | (91.5 to 93.1) | (90.5 to 94.3) | (91.7 to 92.8) | (91.3 to 92.9) | (89.6 to 94.0) | (91.3 to 92.8) | (91.8 to 93.0) | (90.6 to 93.0) |
| Current Smoker, %                  | 189 (11.5)     | 79 (9.4)       | 19 (15.4)      | 194 (11.4)     | 82 (10.2)      | 11 (10.4)      | 118 (12.0)     | 121 (10.0)     | 42 (10.7)      |
| Diabetes mellitus, %               | 50 (3.0)       | 30 (3.6)       | 5 (4.1)        | 52 (3.1)       | 29 (3.6)       | 4 (3.8)        | 32 (3.3)       | 39 (3.2)       | 13 (3.3)       |
| Systolic blood pressure, mmHg      | 141            | 141            | 139            | 141            | 140            | 141            | 141            | 141            | 140            |
|                                    | (140 to 141)   | (140 to 142)   | (136 to 143)   | (140 to 142)   | (138 to 141)   | (137 to 145)   | (140 to 142)   | (140 to 142)   | (138 to 141)   |
| Diastolic blood pressure, mmHg     | 84             | 84             | 84             | 84             | 84             | 85             | 84             | 84             | 84             |
|                                    | (84 to 85)     | (83 to 85)     | (81 to 86)     | (84 to 85)     | (83 to 85)     | (83 to 87)     | (83 to 85)     | (84 to 85)     | (83 to 85)     |
| Total cholesterol, mmol/l          | 6.36           | 6.24           | 6.25           | 6.29           | 6.36           | 6.33           | 6.32           | 6.31           | 6.33           |
|                                    | (6.30 to 6.41) | (6.17 to 6.32) | (6.04 to 6.46) | (6.23 to 6.35) | (6.28 to 6.44) | (6.10 to 6.56) | (6.25 to 6.39) | (6.24 to 6.37) | (6.22 to 6.44) |
| LDL-cholesterol, mmol/l            | 4.18           | 4.09           | 4.14           | 4.13           | 4.17           | 4.19           | 4.20           | 4.13           | 4.16           |
|                                    | (4.13 to 4.23) | (4.02 to 4.15) | (3.96 to 4.31) | (4.09 to 4.18) | (4.10 to 4.24) | (3.98 to 4.39) | (4.10 to 4.23) | (4.07 to 4.19) | (4.06 to 4.26) |
| HDL-cholesterol, mmol/l            | 1.34           | 1.33           | 1.27           | 1.32           | 1.33           | 1.31           | 1.32           | 1.34           | 1.32           |
|                                    | (1.32 to 1.35) | (1.30 to 1.35) | (1.20 to 1.33) | (1.31 to 1.34) | (1.31 to 1.36) | (1.24 to 1.39) | (1.30 to 1.35) | (1.31 to 1.36) | (1.28 to 1.36) |
| Triglycerides, mmol/l              | 1.70           | 1.60           | 1.80           | 1.70           | 1.70           | 1.60           | 1.70           | 1.70           | 1.70           |
|                                    | (1.20 to 2.30) | (1.20 to 2.40) | (1.20 to 2.40) | (1.20 to 2.30) | (1.20 to 2.40) | (1.30 to 2.30) | (1.20 to 2.40) | (1.20 to 2.30) | (1.30 to 2.40) |
| C-reactive protein, mg/l           | 1.80           | 1.50           | 1.90           | 1.70           | 1.70           | 1.60           | 1.60           | 1.70           | 1.70           |
|                                    | (0.80 to 3.90) | (0.70 to 3.50) | (0.80 to 3.65) | (0.80 to 3.60) | (0.80 to 4.20) | (1.00 to 3.30) | (0.80 to 3.40) | (0.80 to 4.10) | (0.80 to 3.90) |

Data are presented as mean with the 95% confidence interval or number with the corresponding percentage. Skewed variables are presented as median with the 25<sup>th</sup> to 75<sup>th</sup> percentile. LDL = low-density lipoprotein, HDL = high-density lipoprotein

**Supplemental Table IV. MCP-1 Serum Concentrations according to CCL2 Polymorphisms of Male Study Participants**

| MCP-1 serum concentration levels, |        |                                   |                                   |                            |       |       |       |
|-----------------------------------|--------|-----------------------------------|-----------------------------------|----------------------------|-------|-------|-------|
|                                   | pg/ml  |                                   |                                   |                            |       |       |       |
|                                   | Median | 25 <sup>th</sup> Lower percentile | 75 <sup>th</sup> Upper percentile | Beta coefficients (95% CI) | P*    | P†    | P‡    |
| <b>-2835 C/A</b>                  |        |                                   |                                   | -1.10 (-2.98 to 0.78)      | 0.250 | 0.235 | 0.241 |
| -2835 AA                          | 51.71  | 37.85                             | 74.41                             |                            |       |       |       |
| -2835 CA                          | 51.12  | 38.41                             | 67.09                             |                            |       |       |       |
| -2835 CC                          | 51.71  | 37.85                             | 74.41                             |                            |       |       |       |
| <b>-2578 A/G</b>                  |        |                                   |                                   | -0.97 (-2.82 to 0.89)      | 0.306 | 0.272 | 0.298 |
| -2578 GG                          | 51.44  | 37.62                             | 74.19                             |                            |       |       |       |
| -2578 AG                          | 51.12  | 38.41                             | 66.94                             |                            |       |       |       |
| -2578 AA                          | 51.57  | 39.16                             | 67.64                             |                            |       |       |       |
| <b>-2136 A/T</b>                  |        |                                   |                                   | 1.39 (-0.64 to 3.42)       | 0.179 | 0.177 | 0.153 |
| -2136 AA                          | 51.11  | 38.09                             | 67.49                             |                            |       |       |       |
| -2136 AT                          | 51.27  | 38.17                             | 68.08                             |                            |       |       |       |
| -2136 TT                          | 56.45  | 45.24                             | 75.45                             |                            |       |       |       |
| <b>-1811 A/G</b>                  |        |                                   |                                   | 1.72 (-2.20 to 5.65)       | 0.389 | 0.342 | 0.241 |
| -1811 AG                          | 49.69  | 36.33                             | 66.97                             |                            |       |       |       |
| -1811 GG                          | 51.27  | 38.37                             | 68.04                             |                            |       |       |       |
| <b>-927 G/C</b>                   |        |                                   |                                   | 0.86 (-1.09 to 2.80)       | 0.388 | 0.386 | 0.400 |
| -927 GG                           | 51.17  | 38.08                             | 67.36                             |                            |       |       |       |
| -927 GC                           | 51.09  | 39.16                             | 69.86                             |                            |       |       |       |
| -927 CC                           | 55.83  | 43.30                             | 67.11                             |                            |       |       |       |
| <b>+764 C/G</b>                   |        |                                   |                                   | 1.40 (-0.65 to 3.45)       | 0.179 | 0.188 | 0.152 |
| +764 CC                           | 51.15  | 38.16                             | 67.54                             |                            |       |       |       |
| +764 CG                           | 51.38  | 38.33                             | 68.43                             |                            |       |       |       |
| +764 GG                           | 56.77  | 45.29                             | 75.16                             |                            |       |       |       |
| <b>+3726 T/C</b>                  |        |                                   |                                   | -0.69 (-2.38 to 1.01)      | 0.427 | 0.407 | 0.472 |
| +3726 TT                          | 51.46  | 51.46                             | 69.99                             |                            |       |       |       |
| +3726 TC                          | 50.35  | 37.54                             | 66.67                             |                            |       |       |       |
| +3726 CC                          | 52.50  | 40.58                             | 67.92                             |                            |       |       |       |

Beta coefficients adjusted for age (95 % confidence interval) of MCP-1 serum concentration according to CCL2 polymorphisms with the corresponding p-values. P\* = unadjusted p value. P† = p value adjusted for waist circumference, systolic blood pressure and triglycerides; P‡ = p value adjusted for the Framingham Risk Score.

**Supplemental Table V. MCP-1 Serum Concentrations according to CCL2 Polymorphisms of Female Study Participants.**

| MCP-1 serum concentration levels,<br>pg/ml |                                      |                                      |       | Beta coefficients<br>(95% CI) | P*    | P†    | P‡    |
|--------------------------------------------|--------------------------------------|--------------------------------------|-------|-------------------------------|-------|-------|-------|
| Median                                     | 25 <sup>th</sup> Lower<br>percentile | 75 <sup>th</sup> Upper<br>percentile |       |                               |       |       |       |
| <b>-2835 C/A</b>                           |                                      |                                      |       | 1.35 (-1.02 to 3.71)          | 0.264 | 0.300 | 0.270 |
| -2835 AA                                   | 47.86                                | 37.03                                | 67.84 |                               |       |       |       |
| -2835 CA                                   | 49.73                                | 37.32                                | 65.92 |                               |       |       |       |
| -2835 CC                                   | 51.64                                | 38.56                                | 67.44 |                               |       |       |       |
| <b>-2578 A/G</b>                           |                                      |                                      |       | 1.48 (-0.86 to 3.81)          | 0.216 | 0.246 | 0.223 |
| -2578 GG                                   | 47.14                                | 36.41                                | 68.58 |                               |       |       |       |
| -2578 AG                                   | 49.68                                | 37.35                                | 64.95 |                               |       |       |       |
| -2578 AA                                   | 52.44                                | 38.84                                | 67.60 |                               |       |       |       |
| <b>-2136 A/T</b>                           |                                      |                                      |       | 1.39 (-1.12 to 3.98)          | 0.292 | 0.308 | 0.290 |
| -2136 AA                                   | 49.68                                | 37.13                                | 66.13 |                               |       |       |       |
| -2136 AT                                   | 53.29                                | 40.35                                | 67.75 |                               |       |       |       |
| -2136 TT                                   | 51.51                                | 37.25                                | 64.45 |                               |       |       |       |
| <b>-1811 A/G</b>                           |                                      |                                      |       | 0.67 (-5.03 to 6.37)          | 0.817 | 0.764 | 0.270 |
| -1811 AG                                   | 52.69                                | 36.65                                | 65.47 |                               |       |       |       |
| -1811 GG                                   | 50.46                                | 38.16                                | 67.09 |                               |       |       |       |
| <b>-927 G/C</b>                            |                                      |                                      |       | 0.81 (-1.89 to 3.52)          | 0.556 | 0.455 | 0.569 |
| -927 GG                                    | 50.00                                | 37.74                                | 66.15 |                               |       |       |       |
| -927 GC                                    | 50.39                                | 38.62                                | 65.45 |                               |       |       |       |
| -927 CC                                    | 61.34                                | 40.51                                | 72.14 |                               |       |       |       |
| <b>+764 C/G</b>                            |                                      |                                      |       | 1.67 (-0.97 to 4.34)          | 0.213 | 0.235 | 0.216 |
| +764 CC                                    | 49.59                                | 37.07                                | 66.02 |                               |       |       |       |
| +764 CG                                    | 52.96                                | 40.47                                | 67.79 |                               |       |       |       |
| +764 GG                                    | 54.08                                | 35.94                                | 63.72 |                               |       |       |       |
| <b>+3726 T/C</b>                           |                                      |                                      |       | 0.15 (-2.01 to 2.31)          | 0.892 | 0.982 | 0.879 |
| +3726 TT                                   | 51.17                                | 36.86                                | 67.48 |                               |       |       |       |
| +3726 TC                                   | 50.39                                | 39.84                                | 67.30 |                               |       |       |       |
| +3726 CC                                   | 48.49                                | 37.30                                | 64.80 |                               |       |       |       |

Beta coefficients adjusted for age (95 % confidence interval) of MCP-1 serum concentration according to CCL2 polymorphisms with the corresponding p-values. P\* = unadjusted p value. P† = p value adjusted for waist circumference, systolic blood pressure and triglycerides; P‡ = p value adjusted for the Framingham Risk Score.



**Supplemental Table VI. Odds Ratios for Future CAD Events by *CCL2* polymorphism of male study participants.**

|                    |                     |                     | <b>P*</b> | <b>P†</b> | <b>P‡</b> |
|--------------------|---------------------|---------------------|-----------|-----------|-----------|
| <b>-2835 C/A</b>   |                     |                     |           |           |           |
| AA (ref) – CA – CC | 1.08 (0.72 to 1.64) | 0.84 (0.56 to 1.26) | 0.054     | 0.013     | 0.036     |
| AA vs CA + CC      |                     | 0.93 (0.63 to 1.39) | 0.736     | 0.356     | 0.637     |
| CC vs CA + AA      |                     | 0.78 (0.64 to 0.96) | 0.017     | 0.003     | 0.011     |
| <b>-2578 A/G</b>   |                     |                     |           |           |           |
| GG (ref) – GA – AA | 1.10 (0.73 to 1.66) | 0.87 (0.58 to 1.30) | 0.077     | 0.029     | 0.069     |
| GG vs GA + AA      |                     | 0.96 (0.65 to 1.42) | 0.841     | 0.380     | 0.670     |
| AA vs GA + GG      |                     | 0.80 (0.65 to 0.97) | 0.027     | 0.008     | 0.022     |
| <b>-2136 A/T</b>   |                     |                     |           |           |           |
| AA (ref) – AT – TT | 1.00 (0.80 to 1.25) | 0.98 (0.58 to 1.64) | 0.996     | 0.749     | 0.924     |
| AA vs AT + TT      |                     | 1.00 (0.81 to 1.23) | 0.986     | 0.665     | 0.720     |
| TT vs AT + AA      |                     | 0.98 (0.59 to 1.63) | 0.931     | 0.649     | 0.959     |
| <b>-1811 A/G</b>   |                     |                     |           |           |           |
| AG vs GG           |                     | 1.13 (0.80 to 1.61) | 0.481     | 0.244     | 0.193     |
| <b>-927 G/C</b>    |                     |                     |           |           |           |
| GG (ref) – GC – CC | 0.94 (0.75 to 1.17) | 0.95 (0.60 to 1.52) | 0.838     | 0.768     | 0.803     |
| GG vs GC + CC      |                     | 0.94 (0.76 to 1.16) | 0.555     | 0.529     | 0.516     |
| CC vs GC + GG      |                     | 0.97 (0.61 to 1.54) | 0.906     | 0.592     | 0.752     |
| <b>+764 C/G</b>    |                     |                     |           |           |           |
| CC (ref) – CG – GG | 1.00 (0.80 to 1.24) | 0.92 (0.54 to 1.57) | 0.952     | 0.672     | 0.907     |
| CC vs CG + GG      |                     | 0.99 (0.80 to 1.22) | 0.914     | 0.708     | 0.785     |
| GG vs CG + CC      |                     | 0.92 (0.54 to 1.56) | 0.755     | 0.509     | 0.799     |
| <b>+3726 T/C</b>   |                     |                     |           |           |           |
| TT (ref) – TC – CC | 0.93 (0.75 to 1.16) | 1.10 (0.80 to 1.53) | 0.547     | 0.939     | 0.656     |
| TT vs TC + CC      |                     | 0.97 (0.78 to 1.19) | 0.748     | 0.793     | 0.901     |
| CC vs TC + TT      |                     | 1.15 (0.85 to 1.55) | 0.369     | 0.886     | 0.408     |

Odds ratios and the corresponding 95% confidence interval calculated by conditional logistic regression, taking into account matching for age, gender, and enrollment time per *CCL2* polymorphism. P\* = Unadjusted p value. P† = p value adjusted for body mass index, waist circumference, systolic blood pressure, diastolic blood pressure and triglycerides; P‡ = p value adjusted for the Framingham Risk Score.

**Supplemental Table VII. Odds Ratios for Future CAD Events by *CCL2* polymorphism of female study participants.**

|                    |                      |                     | <b>P*</b> | <b>P†</b> | <b>P‡</b> |
|--------------------|----------------------|---------------------|-----------|-----------|-----------|
| <b>-2835 C/A</b>   |                      |                     |           |           |           |
| AA (ref) – CA – CC | 0.87 (0.52 to 1.48)  | 1.04 (0.62 to 1.74) | 0.506     | 0.279     | 0.304     |
| AA vs CA + CC      | 0.96 (0.58 to 1.58)  |                     | 0.864     | 0.327     | 0.479     |
| CC vs CA + AA      | 1.16 (0.88 to 1.53)  |                     | 0.292     | 0.363     | 0.269     |
| <b>-2578 A/G</b>   |                      |                     |           |           |           |
| GG (ref) – GA – AA | 0.92 (0.54 to 1.54)  | 1.06 (0.63 to 1.77) | 0.625     | 0.417     | 0.407     |
| GG vs GA + AA      | 0.99 (0.60 to 1.63)  |                     | 0.966     | 0.481     | 0.579     |
| AA vs GA + GG      | 1.14 (0.86 to 1.50)  |                     | 0.362     | 0.396     | 0.317     |
| <b>-2136 A/T</b>   |                      |                     |           |           |           |
| AA (ref) – AT – TT | 1.13 (0.84 to 1.53)  | 0.75 (0.38 to 1.48) | 0.464     | 0.608     | 0.629     |
| AA vs AT + TT      | 1.07 (0.81 to 1.42)  |                     | 0.647     | 0.582     | 0.688     |
| TT vs AT + AA      | 0.73 (0.37 to 1.43)  |                     | 0.349     | 0.549     | 0.493     |
| <b>-1811 A/G</b>   |                      |                     |           |           |           |
| AG vs GG           | 1.36 (0.80 to 2.32)  |                     | 0.252     | 0.144     | 0.213     |
| <b>-927 G/C</b>    |                      |                     |           |           |           |
| GG (ref) – GC – CC | 0.88 (0.65 to 1.20)  | 0.69 (0.33 to 1.47) | 0.501     | 0.654     | 0.467     |
| GG vs GC + CC      | 0.86 (0.64 to 1.16)  |                     | 0.318     | 0.671     | 0.448     |
| CC vs GC + GG      | 0.73 (0.35 to 1.52)  |                     | 0.392     | 0.365     | 0.253     |
| <b>+764 C/G</b>    |                      |                     |           |           |           |
| CC (ref) – CG – GG | 1.17 (0.88 to 1.56)  | 0.90 (0.44 to 1.82) | 0.520     | 0.637     | 0.529     |
| CC vs CG + GG      | 1.14 (0.86 to 1.50)  |                     | 0.370     | 0.359     | 0.390     |
| GG vs CG + CC      | 0.86 (0.428 to 1.74) |                     | 0.681     | 0.960     | 0.671     |
| <b>+3726 T/C</b>   |                      |                     |           |           |           |
| TT (ref) – TC – CC | 1.05 (0.77 to 1.44)  | 1.64 (1.10 to 2.43) | 0.037     | 0.054     | 0.045     |
| TT vs TC + CC      | 1.20 (0.90 to 1.60)  |                     | 0.215     | 0.213     | 0.170     |
| CC vs TC + TT      | 1.59 (1.11 to 2.27)  |                     | 0.011     | 0.017     | 0.015     |

Odds ratios and the corresponding 95% confidence interval calculated by conditional logistic regression, taking into account matching for age, gender, and enrollment time per *CCL2* polymorphism. P\* = Unadjusted p value. P† = p value adjusted for body mass index, waist circumference, systolic blood pressure, diastolic blood pressure and triglycerides; P‡ = p value adjusted for the Framingham Risk Score.

**Supplemental Table VIII. Estimated *CCL2* Polymorphism Combination Frequencies.**

| <b>-2835</b> | <b>-2578</b> | <b>-2136</b> | <b>-1811</b> | <b>-927</b> | <b>+764</b> | <b>+3726</b> | <b>Haplotype</b> | <b>Frequency, %</b> |
|--------------|--------------|--------------|--------------|-------------|-------------|--------------|------------------|---------------------|
| A            | G            | A            | A            | G           | C           | T            | H1               | 27.8                |
| C            | A            | A            | A            | C           | C           | T            | H2               | 21.0 (48.8)         |
| C            | A            | T            | A            | G           | G           | C            | H3               | 19.6 (68.4)         |
| C            | A            | A            | A            | G           | C           | C            | H4               | 18.5 (86.9)         |
| C            | A            | A            | A            | G           | C           | T            | H5               | 7.9 (94.8)          |
| C            | A            | A            | G            | G           | C           | T            | H6               | 4.4 (99.3)          |

**Supplemental Table IX. MCP-1 Serum Concentration Ratios according to *CCL2* Haplotypes**

| <b>Haplotype</b> | <b>Ratio (95% CI)</b>  | <b>P*</b> | <b>P†</b> | <b>P‡</b> |
|------------------|------------------------|-----------|-----------|-----------|
| <b>Men</b>       |                        |           |           |           |
| H1               | Ref                    | -         | -         | -         |
| H2               | -0.04 (-2.36 to 2.28)  | 0.971     | 0.937     | 0.947     |
| H3               | 0.37 (-2.06 to 2.80)   | 0.766     | 0.777     | 0.724     |
| H4               | -2.54 (-4.95 to -0.13) | 0.039     | 0.031     | 0.038     |
| H5               | -2.71 (-6.02 to 0.60)  | 0.109     | 0.111     | 0.098     |
| H6               | -2.27 (-6.40 to 1.87)  | 0.282     | 0.255     | 0.237     |
| <b>Women</b>     |                        |           |           |           |
| H1               | Ref                    | -         | -         | -         |
| H2               | 1.61 (-1.48 to 4.71)   | 0.308     | 0.275     | 0.316     |
| H3               | 2.63 (-0.45 to 5.70)   | 0.095     | 0.121     | 0.100     |
| H4               | -0.65 (-3.74 to 2.45)  | 0.684     | 0.599     | 0.690     |
| H5               | 4.05 (-0.14 to 8.25)   | 0.058     | 0.077     | 0.062     |
| H6               | 0.95 (-5.09 to 6.98)   | 0.759     | 0.903     | 0.792     |

Age and sex corrected MCP-1 serum concentration ratios with the corresponding 95 % confidence interval for the most six common *CCL2* haplotypes. MCP-1 serum concentration ratios are corrected for age only in the separate analysis for men and women. The haplotype with the highest frequency (H1) is used as reference haplotype. P\* = p value adjusted for age and sex, or age in the men and women analysis only. P† = p value adjusted for age and sex, or age in the men and women analysis only, waist circumference, systolic blood pressure and triglycerides; P‡ = p value adjusted for the Framingham Risk Score.

**Supplemental Table X. CAD Ratios by *CCL2* haplotypes**

|              | Ratio (95% CI)      | P*    | P†    | P‡    |
|--------------|---------------------|-------|-------|-------|
| <b>Men</b>   |                     |       |       |       |
| H1           | Ref                 | -     | -     | -     |
| H2           | 0.85 (0.69 to 1.04) | 0.115 | 0.072 | 0.095 |
| H3           | 0.86 (0.69 to 1.06) | 0.151 | 0.122 | 0.207 |
| H4           | 0.94 (0.76 to 1.16) | 0.564 | 0.388 | 0.562 |
| H5           | 0.70 (0.52 to 0.94) | 0.019 | 0.011 | 0.011 |
| H6           | 0.86 (0.60 to 1.23) | 0.403 | 0.179 | 0.252 |
| <b>Women</b> |                     |       |       |       |
| H1           | Ref                 | -     | -     | -     |
| H2           | 0.98 (0.74 to 1.30) | 0.892 | 0.920 | 0.801 |
| H3           | 1.12 (0.85 to 1.48) | 0.404 | 0.442 | 0.511 |
| H4           | 0.31 (0.99 to 1.73) | 0.055 | 0.061 | 0.042 |
| H5           | 0.92 (0.63 to 1.35) | 0.683 | 0.583 | 0.549 |
| H6           | 0.80 (0.45 to 1.40) | 0.429 | 0.217 | 0.245 |

Age and sex adjusted ratios for CAD events with the corresponding 95 % confidence interval for the most six common MCP-1 haplotypes. CAD ratios are corrected for age only in the separate analysis for men and women. The haplotype with the highest frequency (H1) is used as reference haplotype. P\* = p value adjusted for age and sex, or age in the men and women analysis only. P† = p value adjusted for age and sex, or age in the men and women analysis only, waist circumference, systolic blood pressure and triglycerides; P‡ = p value adjusted for the Framingham Risk Score.

Supplementary Figure I.

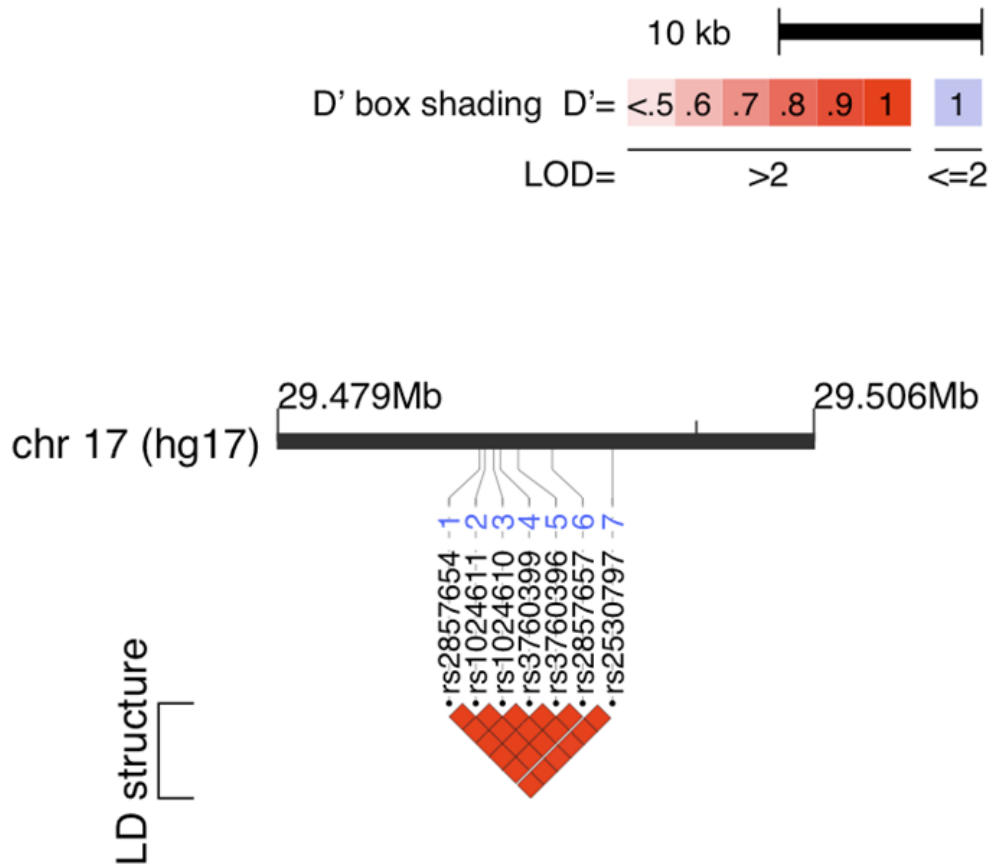

Positions of the 7 SNPs at the *CCL2* locus and LD structure for the 7 *CCL2* typed single nucleotide polymorphisms labeled by 1 to 7 and just below their unique RS numbers. SNP 1 refers to gene position -2835, 2 to -2578, 3 to -2136, 4 to -1811, 5 to -927, 6 to +764 and 7 to +3726. The bottom of the figure depicts an LD plot for the locus with pairwise LD values ( $D'$ ) presented. See the key for details. The figure was generated using LocusView (T. Petryshen, A. Kirby, M. Ainscow, unpublished software, available from the Broad Institute, Cambridge, MA. [www.broad.mit.edu/mpg/locusview/](http://www.broad.mit.edu/mpg/locusview/)).
